# Supplementary material
Source: PubMed Central journal article supplement (PMC6105907)
Supplement: zii999092513s1.pdf [file zii999092513s1.pdf]

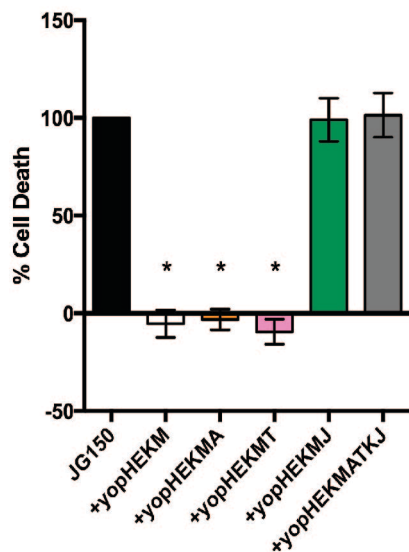

**Figure S1. Cytotoxicity of *Y. pestis* T3SS mutants in immortalized macrophages.** C57BL/6 immortalized macrophages (iMacs) were infected with *Y. pestis* at an MOI of 1. Loss of cell membrane integrity was monitored kinetically by assaying ethidium homodimer uptake and quantified by calculating the area under each curve (AUC), as described (see Methods of main text and (1)). Amount of cell death over 6 hours calculated by AUC was normalized to the amount of cell death caused by the T3SS-positive strain JG150 (set to 100%). Mean and standard error shown for two combined independent experiments, each with n=4. \* denotes  $p < 0.05$  compared to JG150 (one-way ANOVA with Dunnett's correction).

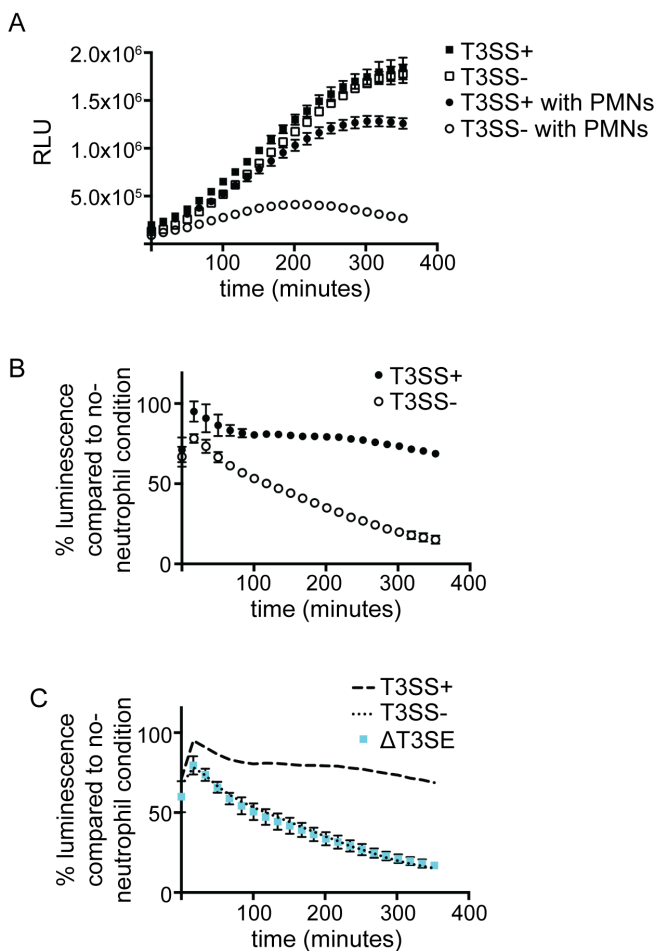

**Figure S2. T3SS-dependent and effector-dependent survival of *Y. pestis* in co-culture with neutrophils.** (A) Relative light units (RLU) of JG150L (T3SS+, shaded symbols) and JG152L (T3SS-, open symbols) in the presence (circles) and absence (squares) of primary human neutrophils. (B) Same data as in (A), analyzed such that the luminescence of each biological replicate in the presence of neutrophils is shown as a percentage of that replicate's luminescence in the absence of neutrophils at the same time point. (C) Luminescence of JG150L (T3SS+), JG152L (T3SS-), and JG150L $\Delta$ T3SE ( $\Delta$ T3SE) in the presence of neutrophils; data analyzed as in panel B. JG150L $\Delta$ T3SE is as susceptible to neutrophil killing as JG152L. Shown: mean and standard deviation (symbols) or mean only (lines) of 3 technical replicates. Representative of 7 independent experiments.

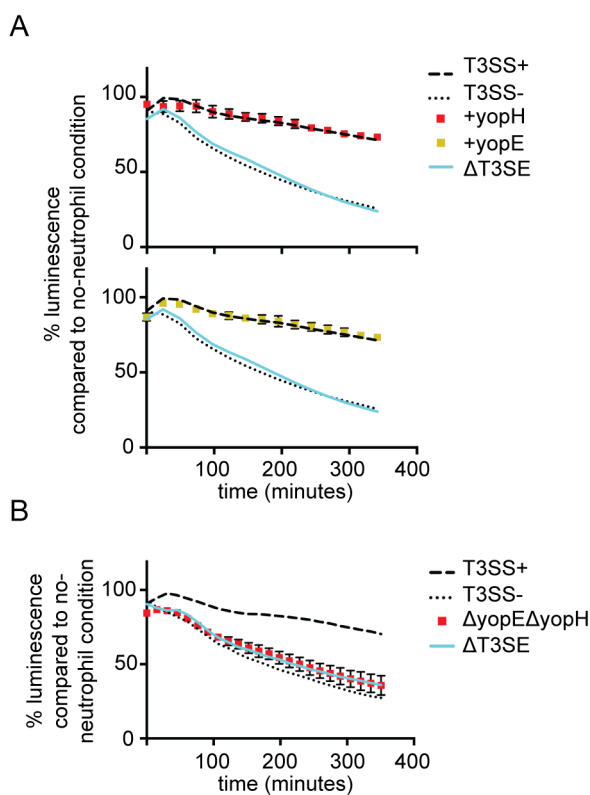

**Figure S3. YopH and YopE are each sufficient to promote survival of *Y. pestis* in the presence of primary human neutrophils.** (A) Addition of a functional *yopH* or *yopE* gene to the JG150LΔT3SE genetic background rescues bacterial survival to wild-type levels. (B) A strain carrying deletions of both the *yopH* and *yopE* genes from the JG150L genetic background (ΔyopEΔyopH) is as sensitive to neutrophil killing as JG150LΔT3SE (ΔT3SE). Shown: mean and standard deviation (symbols) or mean only (lines) of 3 replicates. Representative of 2 independent experiments.

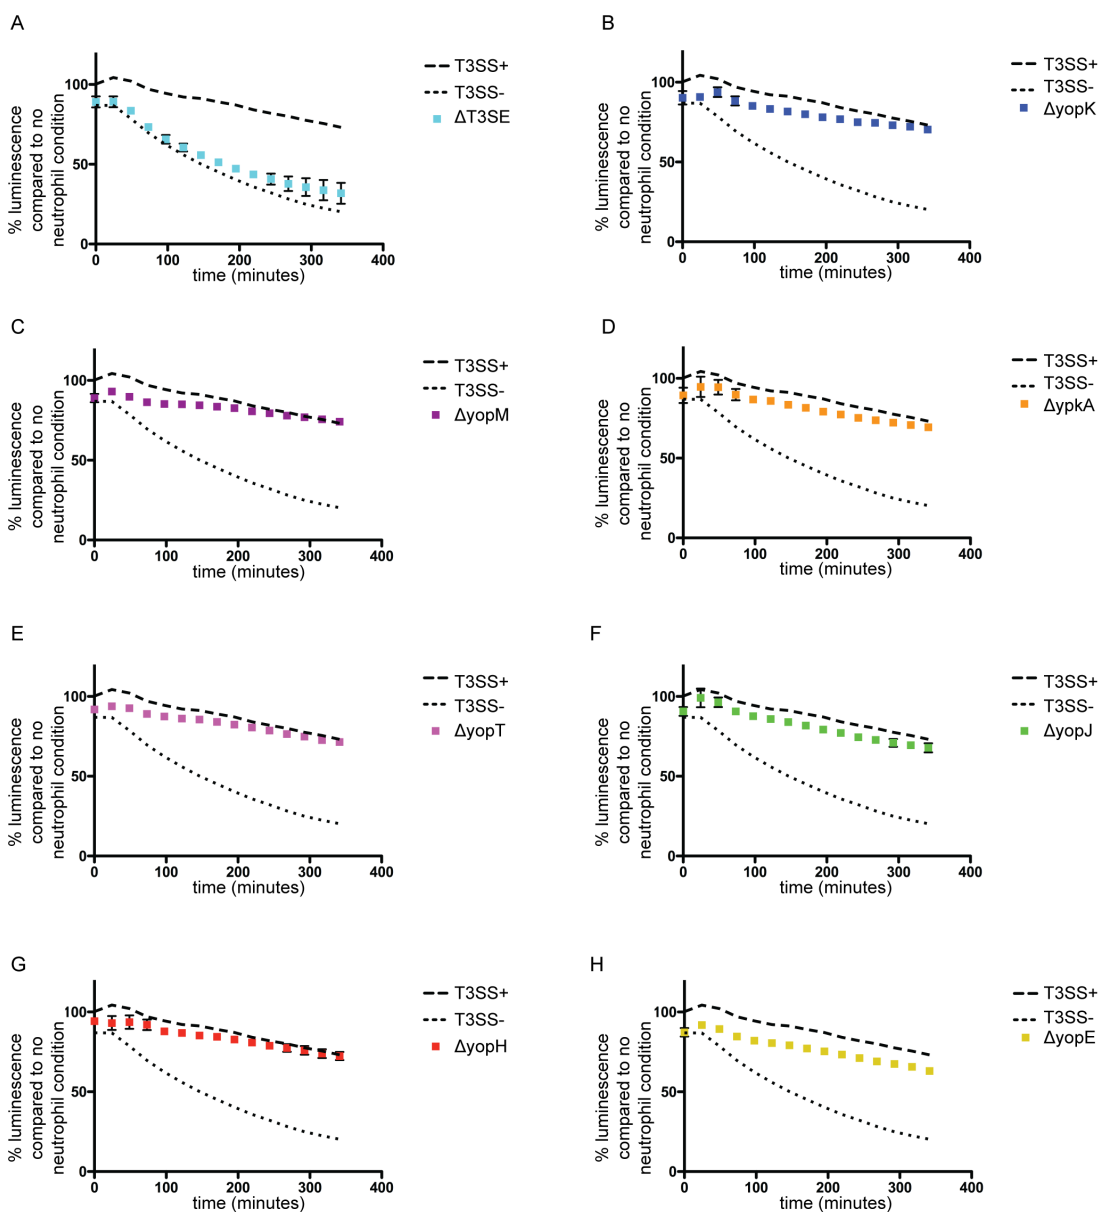

**Figure S4. No single T3SS effector is required for survival of *Y. pestis* in co-culture with primary human neutrophils.** Although a strain expressing no effectors is susceptible to killing by neutrophils (A, and see Figure S2C), deletion of any single effector from JG150L does not enhance bacterial killing (B, *yopK* deletion; C, *yopM* deletion; D, *ypkA* deletion; E, *yopT* deletion; F, *yopJ* deletion; G, *yopH* deletion; H, *yopE* deletion). Shown: mean and standard deviation (symbols) or mean only (lines) of 3 replicates. Representative of 2 independent experiments.

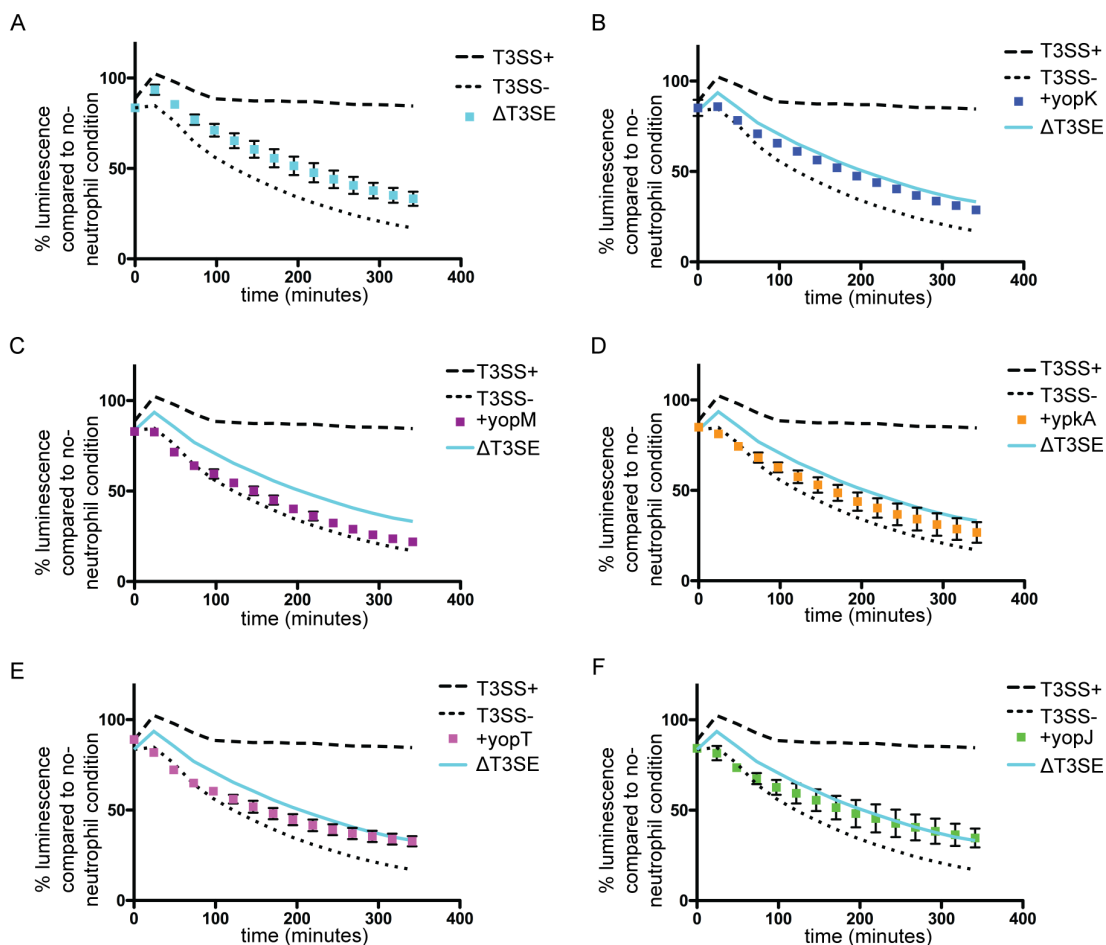

**Figure S5. Unlike YopH and YopE, other T3SS effectors are not sufficient to prevent bacterial killing by primary human neutrophils.** Addition of a functional *yopH* or *yopE* gene to the JG150L $\Delta$ T3SE genetic background rescues bacterial survival to wild-type levels (Figure S3A). By contrast, addition of any other single effector to JG150L $\Delta$ T3SE does not increase bacterial survival (**A**, no effectors; **B**, *yopK* alone; **C**, *yopM* alone; **D**, *ypkA* alone; **E**, *yopT* alone; **F**, *yopJ* alone). Shown: mean and standard deviation (symbols) or mean only (lines) of 3 replicates. Representative of 2 independent experiments.

**Table S1. *Y. pestis* strains and relevant characteristics.**

| Descriptive name                           | Genotype                                                                                                                                                                                                                                                                                                                                                                                                                               | Strain number | Relevant characteristics                                                                            | Source                    |
|--------------------------------------------|----------------------------------------------------------------------------------------------------------------------------------------------------------------------------------------------------------------------------------------------------------------------------------------------------------------------------------------------------------------------------------------------------------------------------------------|---------------|-----------------------------------------------------------------------------------------------------|---------------------------|
| KIM1001                                    | <i>pgm</i> <sup>+</sup> /pMT1 <sup>+</sup> pCD1 <sup>+</sup> pPCP1 <sup>+</sup>                                                                                                                                                                                                                                                                                                                                                        |               | Fully virulent strain reconstructed from KIM10                                                      | (2)                       |
| JG150A                                     | $\Delta$ <i>pgm</i> /pMT1 <sup>+</sup> pCD1 <sup>+</sup> pPCP1 <sup>+</sup>                                                                                                                                                                                                                                                                                                                                                            |               | Spontaneous $\Delta$ <i>pgm</i> derivative of KIM1001                                               | (3)                       |
| JG150L                                     | $\Delta$ <i>pgm</i> /pMT1 <sup>+</sup> pCD1 <sup>+</sup> pPCP1 <sup>+</sup> pML001 <sup>+</sup>                                                                                                                                                                                                                                                                                                                                        | JG598         | Luminescent version of JG150A                                                                       | This work                 |
| JG152L                                     | $\Delta$ <i>pgm</i> /pMT1 <sup>+</sup> pCD1 <sup>-</sup> pPCP1 <sup>+</sup> pML001 <sup>+</sup>                                                                                                                                                                                                                                                                                                                                        | JG597         | Spontaneous pCD1 <sup>-</sup> derivative of JG150A, luminescent                                     | This work                 |
| KIM1001 $\Delta$ T3SE                      | <i>pgm</i> <sup>+</sup> /pMT1 <sup>+</sup> pCD1( <i>yopH</i> <sup><math>\Delta</math>3-467</sup> <i>yopE</i> <sup><math>\Delta</math>40-197</sup> <i>yopK</i> <sup><math>\Delta</math>4-181</sup> <i>yopM</i> <sup><math>\Delta</math>3-408</sup> <i>ypkA</i> <sup><math>\Delta</math>3-731</sup> <i>yopJ</i> <sup><math>\Delta</math>4-288</sup> <i>yopT</i> <sup><math>\Delta</math>3-320</sup> ) pPCP1 <sup>+</sup>                 | JG917         | In-frame deletions of all seven effector proteins                                                   | This work and used in (1) |
| JG150L $\Delta$ T3SE                       | $\Delta$ <i>pgm</i> /pMT1 <sup>+</sup> pCD1( <i>yopH</i> <sup><math>\Delta</math>3-467</sup> <i>yopE</i> <sup><math>\Delta</math>40-197</sup> <i>yopK</i> <sup><math>\Delta</math>4-181</sup> <i>yopM</i> <sup><math>\Delta</math>3-408</sup> <i>ypkA</i> <sup><math>\Delta</math>3-731</sup> <i>yopJ</i> <sup><math>\Delta</math>4-288</sup> <i>yopT</i> <sup><math>\Delta</math>3-320</sup> ) pPCP1 <sup>+</sup> pML001 <sup>+</sup> | JG715         | $\Delta$ <i>pgm</i> and luminescent derivative of JG917                                             | This work                 |
| KIM1001 $\Delta$ T3SE::<br>+ <i>yopHE</i>  | <i>pgm</i> <sup>+</sup> /pMT1 <sup>+</sup> pCD1( <i>yopK</i> <sup><math>\Delta</math>4-181</sup> <i>yopM</i> <sup><math>\Delta</math>3-408</sup> <i>ypkA</i> <sup><math>\Delta</math>3-731</sup> <i>yopJ</i> <sup><math>\Delta</math>4-288</sup> <i>yopT</i> <sup><math>\Delta</math>3-320</sup> ) pPCP1 <sup>+</sup>                                                                                                                  | JG918         | Derivative of JG917 in which the functional ORFs for <i>yopH</i> and <i>yopE</i> have been restored | This work                 |
| KIM1001 $\Delta$ T3SE::<br>+ <i>yopHEK</i> | <i>pgm</i> <sup>+</sup> /pMT1 <sup>+</sup> pCD1( <i>yopM</i> <sup><math>\Delta</math>3-408</sup> <i>ypkA</i> <sup><math>\Delta</math>3-731</sup> <i>yopJ</i> <sup><math>\Delta</math>4-288</sup> <i>yopT</i> <sup><math>\Delta</math>3-320</sup> ) pPCP1 <sup>+</sup>                                                                                                                                                                  | JG919         | Derivative of JG918 in which the functional ORF for <i>yopK</i> has been restored                   | This work                 |
| KIM1001 $\Delta$ T3SE::<br>+ <i>yopHEM</i> | <i>pgm</i> <sup>+</sup> /pMT1 <sup>+</sup> pCD1( <i>yopK</i> <sup><math>\Delta</math>4-181</sup> <i>ypkA</i> <sup><math>\Delta</math>3-731</sup> <i>yopJ</i> <sup><math>\Delta</math>4-288</sup> <i>yopT</i> <sup><math>\Delta</math>3-320</sup> ) pPCP1 <sup>+</sup>                                                                                                                                                                  | JG920         | Derivative of JG918 in which the functional ORF for <i>yopM</i> has been restored                   | This work                 |

**Table S1. *Y. pestis* strains and relevant characteristics (continued)**

| <b>Descriptive name</b>               | <b>Genotype</b>                                                                                                                                                     | <b>Strain number</b> | <b>Relevant characteristics</b>                                                                                                    | <b>Source</b> |
|---------------------------------------|---------------------------------------------------------------------------------------------------------------------------------------------------------------------|----------------------|------------------------------------------------------------------------------------------------------------------------------------|---------------|
| KIM1001ΔT3SE::<br>+ <i>yopHEKM</i>    | <i>pgm</i> <sup>+</sup> /pMT1 <sup>+</sup> pCD1 ( <i>ypkA</i> <sup>Δ3-731</sup> <i>yopJ</i> <sup>Δ4-288</sup><br><i>yopT</i> <sup>Δ3-320</sup> ) pPCP1 <sup>+</sup> | JG921                | Derivative of JG919 in which the functional ORF for <i>yopM</i> has been restored                                                  | This work     |
| KIM1001ΔT3SE::<br>+ <i>yopHEKMA</i>   | <i>pgm</i> <sup>+</sup> /pMT1 <sup>+</sup> pCD1 ( <i>yopJ</i> <sup>Δ4-288</sup> <i>yopT</i> <sup>Δ3-320</sup> )<br>pPCP1 <sup>+</sup>                               | JG922                | Derivative of JG921 in which the functional ORF for <i>ypkA</i> has been restored                                                  | This work     |
| KIM1001ΔT3SE::<br>+ <i>yopHEKMT</i>   | <i>pgm</i> <sup>+</sup> /pMT1 <sup>+</sup> pCD1 ( <i>ypkA</i> <sup>Δ3-731</sup> <i>yopJ</i> <sup>Δ4-288</sup> )<br>pPCP1 <sup>+</sup>                               | JG923                | Derivative of JG921 in which the functional ORF for <i>yopT</i> has been restored                                                  | This work     |
| KIM1001ΔT3SE::<br>+ <i>yopHEKMJ</i>   | <i>pgm</i> <sup>+</sup> /pMT1 <sup>+</sup> pCD1 ( <i>ypkA</i> <sup>Δ3-731</sup> <i>yopT</i> <sup>Δ3-320</sup> )<br>pPCP1 <sup>+</sup>                               | JG924                | Derivative of JG921 in which the functional ORF for <i>yopJ</i> has been restored                                                  | This work     |
| KIM1001ΔT3SE::<br>+ <i>yopHEKMJT</i>  | <i>pgm</i> <sup>+</sup> /pMT1 <sup>+</sup> pCD1 ( <i>ypkA</i> <sup>Δ3-731</sup> ) pPCP1 <sup>+</sup>                                                                | JG925                | Derivative of JG924 in which the functional ORF for <i>yopT</i> has been restored                                                  | This work     |
| KIM1001ΔT3SE::<br>+ <i>yopHEKMAJ</i>  | <i>pgm</i> <sup>+</sup> /pMT1 <sup>+</sup> pCD1 ( <i>yopT</i> <sup>Δ3-320</sup> ) pPCP1 <sup>+</sup>                                                                | JG926                | Derivative of JG922 in which the functional ORF for <i>yopJ</i> has been restored                                                  | This work     |
| KIM1001ΔT3SE::<br>+ <i>yopHEKMAT</i>  | <i>pgm</i> <sup>+</sup> /pMT1 <sup>+</sup> pCD1 ( <i>yopJ</i> <sup>Δ4-288</sup> ) pPCP1 <sup>+</sup>                                                                | JG927                | Derivative of JG922 in which the functional ORF for <i>yopT</i> has been restored                                                  | This work     |
| KIM1001ΔT3SE::<br>+ <i>yopHEKMAJT</i> | <i>pgm</i> <sup>+</sup> /pMT1 <sup>+</sup> pCD1 <sup>+</sup> pPCP1 <sup>+</sup>                                                                                     | JG928                | Derivative of JG926 in which the functional ORF for <i>yopT</i> has been restored, fully complemented strain with respect to JG917 | This work     |
| JG150ΔT3SE::<br>+ <i>yopHEKM</i>      | Δ <i>pgm</i> /pMT1 <sup>+</sup> pCD1 ( <i>ypkA</i> <sup>Δ3-731</sup> <i>yopJ</i> <sup>Δ4-288</sup><br><i>yopT</i> <sup>Δ3-320</sup> ) pPCP1 <sup>+</sup>            | JG911                | Δ <i>pgm</i> derivative of JG921                                                                                                   | This work     |

**Table S1. *Y. pestis* strains and relevant characteristics (continued)**

| Descriptive name                    | Genotype                                                                                                                                                                                                                                                                   | Strain number | Relevant characteristics                                                                        | Source    |
|-------------------------------------|----------------------------------------------------------------------------------------------------------------------------------------------------------------------------------------------------------------------------------------------------------------------------|---------------|-------------------------------------------------------------------------------------------------|-----------|
| JG150ΔT3SE::<br>+ <i>yopHEKMA</i>   | Δ <i>pgm</i> /pMT1 <sup>+</sup> pCD1 ( <i>yopJ</i> <sup>Δ4-288</sup> <i>yopT</i> <sup>Δ3-320</sup> )<br>pPCP1 <sup>+</sup>                                                                                                                                                 | JG912         | Δ <i>pgm</i> derivative of JG922                                                                | This work |
| JG150ΔT3SE::<br>+ <i>yopHEKMT</i>   | Δ <i>pgm</i> /pMT1 <sup>+</sup> pCD1 ( <i>ypkA</i> <sup>Δ3-731</sup> <i>yopJ</i> <sup>Δ4-288</sup> )<br>pPCP1 <sup>+</sup>                                                                                                                                                 | JG913         | Δ <i>pgm</i> derivative of JG923                                                                | This work |
| JG150ΔT3SE::<br>+ <i>yopHEKMJ</i>   | Δ <i>pgm</i> /pMT1 <sup>+</sup> pCD1 ( <i>ypkA</i> <sup>Δ3-731</sup> <i>yopT</i> <sup>Δ3-320</sup> )<br>pPCP1 <sup>+</sup>                                                                                                                                                 | JG914         | Δ <i>pgm</i> derivative of JG924                                                                | This work |
| JG150ΔT3SE::<br>+ <i>yopHEKMAJT</i> | Δ <i>pgm</i> /pMT1 <sup>+</sup> pCD1 <sup>+</sup> pPCP1 <sup>+</sup>                                                                                                                                                                                                       | JG915         | Δ <i>pgm</i> derivative of JG928                                                                | This work |
| JG150LΔ <i>yopH</i>                 | Δ <i>pgm</i> /pMT1 <sup>+</sup> pCD1 ( <i>yopH</i> <sup>Δ3-467</sup> ) pPCP1 <sup>+</sup><br>pML001 <sup>+</sup>                                                                                                                                                           | JG673         | In-frame deletion of<br><i>yopH</i> ; luminescent                                               | This work |
| JG150LΔ <i>yopE</i>                 | Δ <i>pgm</i> /pMT1 <sup>+</sup> pCD1 ( <i>yopE</i> <sup>Δ40-197</sup> ) pPCP1 <sup>+</sup><br>pML001 <sup>+</sup>                                                                                                                                                          | JG674         | In-frame deletion of <i>yopE</i> ;<br>luminescent                                               | This work |
| JG150LΔ <i>yopK</i>                 | Δ <i>pgm</i> /pMT1 <sup>+</sup> pCD1 ( <i>yopK</i> <sup>Δ4-181</sup> ) pPCP1 <sup>+</sup><br>pML001 <sup>+</sup>                                                                                                                                                           | JG675         | In-frame deletion of <i>yopK</i> ;<br>luminescent                                               | This work |
| JG150LΔ <i>yopM</i>                 | Δ <i>pgm</i> /pMT1 <sup>+</sup> pCD1 ( <i>yopM</i> <sup>Δ3-408</sup> ) pPCP1 <sup>+</sup><br>pML001 <sup>+</sup>                                                                                                                                                           | JG679         | In-frame deletion of<br><i>yopM</i> ; luminescent                                               | This work |
| JG150LΔ <i>ypkA</i>                 | Δ <i>pgm</i> /pMT1 <sup>+</sup> pCD1 ( <i>ypkA</i> <sup>Δ3-731</sup> ) pPCP1 <sup>+</sup><br>pML001 <sup>+</sup>                                                                                                                                                           | JG677         | In-frame deletion of <i>ypkA</i> ;<br>luminescent                                               | This work |
| JG150LΔ <i>yopT</i>                 | Δ <i>pgm</i> /pMT1 <sup>+</sup> pCD1 ( <i>yopT</i> <sup>Δ3-320</sup> ) pPCP1 <sup>+</sup><br>pML001 <sup>+</sup>                                                                                                                                                           | JG676         | In-frame deletion of <i>yopT</i> ;<br>luminescent                                               | This work |
| JG150LΔ <i>yopJ</i>                 | Δ <i>pgm</i> /pMT1 <sup>+</sup> pCD1 ( <i>yopJ</i> <sup>Δ4-288</sup> ) pPCP1 <sup>+</sup><br>pML001 <sup>+</sup>                                                                                                                                                           | JG678         | In-frame deletion of <i>yopJ</i> ;<br>luminescent                                               | This work |
| JG150ΔT3SE::+ <i>yopH</i>           | Δ <i>pgm</i> /pMT1 <sup>+</sup> pCD1 ( <i>yopE</i> <sup>Δ40-197</sup> <i>yopK</i> <sup>Δ4-181</sup><br><i>yopM</i> <sup>Δ3-408</sup> <i>ypkA</i> <sup>Δ3-731</sup> <i>yopJ</i> <sup>Δ4-288</sup> <i>yopT</i> <sup>Δ3-320</sup> )<br>pPCP1 <sup>+</sup>                     | JG734         | Derivative of<br>JG150ΔT3SE in which<br>the functional ORF for<br><i>yopH</i> has been restored | This work |
| JG150LΔT3SE::+ <i>yopH</i>          | Δ <i>pgm</i> /pMT1 <sup>+</sup> pCD1 ( <i>yopE</i> <sup>Δ40-197</sup> <i>yopK</i> <sup>Δ4-181</sup><br><i>yopM</i> <sup>Δ3-408</sup> <i>ypkA</i> <sup>Δ3-731</sup> <i>yopJ</i> <sup>Δ4-288</sup> <i>yopT</i> <sup>Δ3-320</sup> )<br>pPCP1 <sup>+</sup> pML001 <sup>+</sup> | JG680         | Luminescent version of<br>JG734                                                                 | This work |



**Table S1. *Y. pestis* strains and relevant characteristics (continued)**

| Descriptive name           | Genotype                                                                                                                                                                                                                                                 | Strain number | Relevant characteristics                                                               | Source                       |
|----------------------------|----------------------------------------------------------------------------------------------------------------------------------------------------------------------------------------------------------------------------------------------------------|---------------|----------------------------------------------------------------------------------------|------------------------------|
| JG150ΔT3SE::+ <i>yopE</i>  | $\Delta pgm/pMT1^+$ pCD1 ( <i>yopH</i> <sup>Δ3-467</sup> <i>yopK</i> <sup>Δ4-181</sup> <i>yopM</i> <sup>Δ3-408</sup> <i>ypkA</i> <sup>Δ3-731</sup> <i>yopJ</i> <sup>Δ4-288</sup> <i>yopT</i> <sup>Δ3-320</sup> ) pPCP1 <sup>+</sup>                      | JG733         | Derivative of JG150ΔT3SE in which the functional ORF for <i>yopE</i> has been restored | This work and used in (1, 4) |
| JG150LΔT3SE::+ <i>yopE</i> | $\Delta pgm/pMT1^+$ pCD1 ( <i>yopH</i> <sup>Δ3-467</sup> <i>yopK</i> <sup>Δ4-181</sup> <i>yopM</i> <sup>Δ3-408</sup> <i>ypkA</i> <sup>Δ3-731</sup> <i>yopJ</i> <sup>Δ4-288</sup> <i>yopT</i> <sup>Δ3-320</sup> ) pPCP1 <sup>+</sup> pML001 <sup>+</sup>  | JG681         | Luminescent version of JG733                                                           | This work                    |
| JG150ΔT3SE::+ <i>yopK</i>  | $\Delta pgm/pMT1^+$ pCD1 ( <i>yopH</i> <sup>Δ3-467</sup> <i>yopE</i> <sup>Δ40-197</sup> <i>yopM</i> <sup>Δ3-408</sup> <i>ypkA</i> <sup>Δ3-731</sup> <i>yopJ</i> <sup>Δ4-288</sup> <i>yopT</i> <sup>Δ3-320</sup> ) pPCP1 <sup>+</sup>                     | JG736         | Derivative of JG150ΔT3SE in which the functional ORF for <i>yopK</i> has been restored | This work and used in (1)    |
| JG150LΔT3SE::+ <i>yopK</i> | $\Delta pgm/pMT1^+$ pCD1 ( <i>yopH</i> <sup>Δ3-467</sup> <i>yopE</i> <sup>Δ40-197</sup> <i>yopM</i> <sup>Δ3-408</sup> <i>ypkA</i> <sup>Δ3-731</sup> <i>yopJ</i> <sup>Δ4-288</sup> <i>yopT</i> <sup>Δ3-320</sup> ) pPCP1 <sup>+</sup> pML001 <sup>+</sup> | JG682         | Luminescent version of JG736                                                           | This work                    |
| JG150ΔT3SE::+ <i>yopM</i>  | $\Delta pgm/pMT1^+$ pCD1 ( <i>yopH</i> <sup>Δ3-467</sup> <i>yopE</i> <sup>Δ40-197</sup> <i>yopK</i> <sup>Δ4-181</sup> <i>ypkA</i> <sup>Δ3-731</sup> <i>yopJ</i> <sup>Δ4-288</sup> <i>yopT</i> <sup>Δ3-320</sup> ) pPCP1 <sup>+</sup>                     | JG732         | Derivative of JG150ΔT3SE in which the functional ORF for <i>yopM</i> has been restored | This work and used in (4)    |
| JG150LΔT3SE::+ <i>yopM</i> | $\Delta pgm/pMT1^+$ pCD1 ( <i>yopH</i> <sup>Δ3-467</sup> <i>yopE</i> <sup>Δ40-197</sup> <i>yopK</i> <sup>Δ4-181</sup> <i>ypkA</i> <sup>Δ3-731</sup> <i>yopJ</i> <sup>Δ4-288</sup> <i>yopT</i> <sup>Δ3-320</sup> ) pPCP1 <sup>+</sup> pML001 <sup>+</sup> | JG683         | Luminescent version of JG732                                                           | This work                    |
| JG150ΔT3SE::+ <i>ypkA</i>  | $\Delta pgm/pMT1^+$ pCD1 ( <i>yopH</i> <sup>Δ3-467</sup> <i>yopE</i> <sup>Δ40-197</sup> <i>yopK</i> <sup>Δ4-181</sup> <i>yopM</i> <sup>Δ3-408</sup> <i>yopJ</i> <sup>Δ4-288</sup> <i>yopT</i> <sup>Δ3-320</sup> ) pPCP1 <sup>+</sup>                     | JG730         | Derivative of JG150ΔT3SE in which the functional ORF for <i>ypkA</i> has been restored | This work                    |
| JG150LΔT3SE::+ <i>ypkA</i> | $\Delta pgm/pMT1^+$ pCD1 ( <i>yopH</i> <sup>Δ3-467</sup> <i>yopE</i> <sup>Δ40-197</sup> <i>yopK</i> <sup>Δ4-181</sup> <i>yopM</i> <sup>Δ3-408</sup> <i>yopJ</i> <sup>Δ4-288</sup> <i>yopT</i> <sup>Δ3-320</sup> ) pPCP1 <sup>+</sup> pML001 <sup>+</sup> | JG684         | Luminescent version of JG730                                                           | This work                    |
| JG150ΔT3SE::+ <i>yopT</i>  | $\Delta pgm/pMT1^+$ pCD1 ( <i>yopH</i> <sup>Δ3-467</sup> <i>yopE</i> <sup>Δ40-197</sup> <i>yopK</i> <sup>Δ4-181</sup> <i>yopM</i> <sup>Δ3-408</sup> <i>ypkA</i> <sup>Δ3-731</sup> <i>yopJ</i> <sup>Δ4-288</sup> ) pPCP1 <sup>+</sup>                     | JG708         | Carries in-frame deletions of all effectors except for <i>yopT</i>                     | This work                    |

**Table S1. *Y. pestis* strains and relevant characteristics (continued)**

| <b>Descriptive name</b>    | <b>Genotype</b>                                                                                                                                                                                                                                                | <b>Strain number</b> | <b>Relevant characteristics</b>                                                        | <b>Source</b> |
|----------------------------|----------------------------------------------------------------------------------------------------------------------------------------------------------------------------------------------------------------------------------------------------------------|----------------------|----------------------------------------------------------------------------------------|---------------|
| JG150LΔT3SE::+ <i>yopT</i> | $\Delta pgm/pMT1^+$ pCD1 ( <i>yopH</i> <sup>Δ3-467</sup> <i>yopE</i> <sup>Δ40-197</sup><br><i>yopK</i> <sup>Δ4-181</sup> <i>yopM</i> <sup>Δ3-408</sup> <i>ypkA</i> <sup>Δ3-731</sup> <i>yopJ</i> <sup>Δ4-288</sup> )<br>pPCP1 <sup>+</sup> pML001 <sup>+</sup> | JG685                | Luminescent version of JG708                                                           | This work     |
| JG150ΔT3SE::+ <i>yopJ</i>  | $\Delta pgm/pMT1^+$ pCD1 ( <i>yopH</i> <sup>Δ3-467</sup> <i>yopE</i> <sup>Δ40-197</sup><br><i>yopK</i> <sup>Δ4-181</sup> <i>yopM</i> <sup>Δ3-408</sup> <i>ypkA</i> <sup>Δ3-731</sup> <i>yopT</i> <sup>Δ3-320</sup> )<br>pPCP1 <sup>+</sup>                     | JG735                | Derivative of JG150ΔT3SE in which the functional ORF for <i>yopJ</i> has been restored | This work     |

**Table S2. Primers used to construct and complement *Y. pestis* T3SS mutants**

| <b>Primer Name</b> | <b>Sequence 5' to 3'</b>                                 |
|--------------------|----------------------------------------------------------|
| <b>yopM-A</b>      | ATAGAGCTCTTCAAAAGGGTACTGGATAC                            |
| <b>yopM-B</b>      | GAACATATTGAATGCCTTTCT                                    |
| <b>yopM-C</b>      | AGAAAGGCATTCAATATGTTTCGAGTAGTACGCAAGAGCGTTC              |
| <b>yopM-D</b>      | GGGTCTAGATTTACCAATTTTTTGGATGGGG                          |
| <b>yopJ-A</b>      | ATAGAGCTCCACTACTGATTCAACTTGGACG                          |
| <b>yopJ-B</b>      | ACGGCAAATGCAGAGCAGTCCGATCATTATTTATCCTTATTCA              |
| <b>yopJ-C</b>      | CTGCTCTGCATTTGCCGTTAATGTATTTTGGAAATCTTGCT                |
| <b>yopJ-D</b>      | GGGTCTAGACTGATGTCGTTTATTTCTGGGTAT                        |
| <b>yopE-A</b>      | ATAGAGCTCAGCATTACACACTCCACAGTTGGGT                       |
| <b>yopE-B</b>      | ACGCAGGCAGCAAATGAGATCAAA                                 |
| <b>yopE-C</b>      | CTCATTTGCTGCCTGCGTATATTGATCACTTGTTTG                     |
| <b>yopE-D</b>      | ATATCTAGATATCCAGGCTGTTCAATGGTTGTCGAT                     |
| <b>yopH-A</b>      | ATAGAGCTCAACTGCATCCGTCCGGTG                              |
| <b>yopH-B</b>      | GTTTCATGCTTCCCTCCTT                                      |
| <b>yopH-C</b>      | AAGGAGGGAAGCATGAACAGCTAATGTAAATATTTATTCCTAT<br>GA        |
| <b>yopH-D</b>      | GGGTCTAGACGGTGGTACTAAAAATAGGAGGGA                        |
| <b>ypkA-A</b>      | ATAGAGCTCGGGACGGGTTTAATCAATGAT                           |
| <b>ypkA-B</b>      | TTTCATGCTTTACTCATCCCC                                    |
| <b>ypkA-C</b>      | GGGGATGAGTAAAGCATGAAAATGTGACAAGTGCCCCCTAAG               |
| <b>ypkA-D</b>      | GGGTCTAGAGATCCATCCGATATATCAGTTTCC                        |
| <b>yopK-A</b>      | GGGGAGCTCTGTTAGCCATTATTTTGCTATAC                         |
| <b>yopK-B</b>      | ACGGCAAATGCAGAGCAGAATAAACATAGTTACTACTCCCAA               |
| <b>yopK-C</b>      | CTGCTCTGCATTTGCCGTGGATGAAGCTATATTAAGAGTT                 |
| <b>yopK-D</b>      | ATATCTAGACATTTAAAACAGGGCATGG                             |
| <b>yopT-A</b>      | ATAGAGCTCTAACTTTGTATGGTACCGCGT                           |
| <b>yopT-B</b>      | GTTTAATGCAGACAACCTTCAC                                   |
| <b>yopT-C</b>      | GTGAAGGTTGTCTGCATTAAACGTTTCATCTGTATAACCTATTTA<br>TGTTAGC |
| <b>yopT-D</b>      | AAATCTAGACTCAATGAGCTTCCCAT                               |

## References

1. **Ratner D, Orning MPA, Starheim KK, Marty-Roix R, Proulx MK, Goguen JD, Lien E.** 2016. Manipulation of IL-1 $\beta$  and IL-18 production by *Yersinia pestis* effectors YopJ and YopM and redundant impact on virulence. *Journal of Biological Chemistry* **291**:jbc.M115.697698-jbc.M697115.697698.
2. **Sodeinde OA, Subrahmanyam YV, Stark K, Quan T, Bao Y, Goguen JD.** 1992. A surface protease and the invasive character of plague. *Science* **258**:1004-1007.
3. **Palace SG, Proulx MK, Lu S, Baker RE, Goguen JD.** 2014. Genome-wide mutant fitness profiling identifies nutritional requirements for optimal growth of *Yersinia pestis* in deep tissue. *mBio* **5**:e01385-01314.
4. **Ratner D, Orning MP, Proulx MK, Wang D, Gavrilin MA, Wewers MD, Alnemri ES, Johnson PF, Lee B, Meccas J, Kayagaki N, Goguen JD, Lien E.** 2016. The *Yersinia pestis* Effector YopM Inhibits Pyrin Inflammasome Activation. *PLoS Pathogens* **12**:e1006035.
